# Supplementary material for: Mechanism of the electroneutral sodium/proton antiporter PaNhaP from transition-path shooting
Source: PubMed Central journal article supplement (PMC6465308; doi:10.1038/s41467-019-09739-0), 2019-04-15
Supplement: 41467_2019_9739_MOESM3_ESM.pdf [file 41467_2019_9739_MOESM3_ESM.pdf]

## Description of Supplementary Files

**File Name:** Supplementary Movie 1

**Description:** Representative transition paths are shown. In the first half, the transition path with Na<sup>+</sup> bound (yellow sphere) from the inward to outward-open conformation is shown. In the last half, the transition path with H<sup>+</sup> bound (green sphere) from the outward to inward-open conformation is shown.

**File Name:** Supplementary Data 1

**Description:** The asymmetric dimer conformation of PaNhaP obtained by the simulation is provided in PDB format.
